# Supplementary material
Source: publisher figshare collection journal article supplement (https://geolsoc.figshare.com/ndownloader/files/13574354)
Supplement: Supplementary file 1 [file 13574354]

Table of data: X-ray fluoresence analysis of major elements (oxide wt%) and trace elements (ppm) for specimens NMING F25211 and NMING F25204.
	NMING F25211 tube 1	NMING F25211 tube 2	NMING F25211 tube 3	NMING F25211 tube 4	NMING F25211 tube 5	NMING F25211 tube 6	NMING F25211 tube 7	NMING F25204 tube 1	NMING F25211 Rock surface 1	NMING F25211 Rock surface 2	NMING F25211 Rock surface 3	NMING F25211 Rock surface 4	NMING F25211 Rock surface 5	NMING F25211 Rock surface 6	NMING F25204 Rock surface 1	NMING F25204 Rock surface 2
SiO2	42.75	42.24	47.31	46.21	45.66	47.41	43.66	59.63	54.89	63.55	57.38	47.75	48.73	46.89	58.42	39.5
TiO2	4.03	4.4	4.05	3.66	3.86	2.26	4.72	3.38	2.48	1.98	2.44	4.16	3.9	4.65	3.19	2.54
Al2O3	23.52	23.39	23.1	23.71	21.86	19.26	23.14	14.97	21.19	19.89	22.39	23.73	23.65	23.34	19.56	17.86
FeOT	16.13	16.38	12.49	13.8	14.98	19.27	14.55	11.6	6.81	5.23	6.32	11.61	11.11	12.28	8.7	26.1
MnO	0.08	0.11	0.02	0.07	0.08	0.13	0.09	0.03	0.02	0.02	0.02	0.06	0.06	0.08	0.03	0.12
MgO	b.d.	b.d.	b.d.	b.d.	b.d.	b.d.	b.d.	b.d.	b.d.	b.d.	b.d.	b.d.	b.d.	b.d.	b.d.	b.d.
CaO	0.38	0.37	0.34	0.36	0.39	0.5	0.36	1.61	4.67	0.39	1.61	0.38	0.37	0.32	0.8	1.19
Na2O	n.a.	n.a.	n.a.	n.a.	n.a.	n.a.	n.a.	n.a.	n.a.	n.a.	n.a.	n.a.	n.a.	n.a.	n.a.	n.a.
K2O	6.29	6.14	6.76	6.06	6.38	4.02	6.71	3.38	4.62	3.72	4.6	6.16	5.94	6.53	3.67	5.38
P2O5	0.1	0.11	0.09	0.08	0.07	0.08	0.07	0.16	0.11	0.1	0.1	0.09	0.08	0.1	0.15	0.08
LOI	n.a.	n.a.	n.a.	n.a.	n.a.	n.a.	n.a.	n.a.	n.a.	n.a.	n.a.	n.a.	n.a.	n.a.	n.a.	n.a.
Sc	b.d.	b.d.	b.d.	b.d.	b.d.	b.d.	b.d.	b.d.	b.d.	b.d.	b.d.	b.d.	b.d.	b.d.	b.d.	b.d.
V	717	624	b.d.	b.d.	477	497	626	b.d.	b.d.	b.d.	b.d.	381	601	b.d.	b.d.	744
Cr	269	384	b.d.	b.d.	344	381	375	91	b.d.	b.d.	b.d.	222	269	b.d.	138	385
Mn	608	879	187	561	618	986	723	198	152	131	118	453	470	607	195	947
Co	b.d.	106	b.d.	b.d.	103	224	b.d.	b.d.	b.d.	b.d.	b.d.	b.d.	106	b.d.	b.d.	b.d.
Ni	82	111	b.d.	49	125	144	82	47	23	17	b.d.	76	82	45	41	76
Cu	30	28	b.d.	b.d.	49	67	26	32	21	14	b.d.	31	41	21	18	b.d.
Zn	262	253	162	204	252	350	192	145	104	71	69	168	163	174	113	281
Ga	b.d.	b.d.	b.d.	b.d.	b.d.	b.d.	b.d.	b.d.	b.d.	b.d.	b.d.	b.d.	b.d.	b.d.	b.d.	b.d.
Rb	255	247	225	215	258	192	255	98	155	92	140	212	204	207	104	300
Sr	207	211	164	183	214	176	209	121	123	89	113	3	175	3	111	308
Y	b.d.	b.d.	b.d.	b.d.	b.d.	b.d.	b.d.	b.d.	b.d.	b.d.	b.d.	b.d.	b.d.	b.d.	b.d.	b.d.
Zr	1214	1209	926	968	1455	860	1282	708	647	535	613	1027	1041	1045	656	1422
Nb	86	102	100	80	87	75	84	66	64	45	50	71	79	96	48	144
Cs	b.d.	b.d.	b.d.	b.d.	b.d.	b.d.	b.d.	b.d.	b.d.	b.d.	b.d.	b.d.	b.d.	b.d.	b.d.	b.d.
Ba	2088	2965	b.d.	b.d.	3040	2558	3587	b.d.	b.d.	b.d.	1081	1606	2327	b.d.	906	1968
Ta	91	86	75	73	109	117	60	63	67	46	b.d.	92	88	95	64	b.d.
U	21	25	25	19	17	19	19	21	16	12	13	14	18	22	16	b.d.
As	173	212	185	197	278	153	245	83	69	49	56	163	161	174	64	239
Cd	70	86	84	68	68	b.d.	70	14	77	60	77	60	62	80	62	b.d.
Mo	64	91	98	72	65	67	59	86	74	56	52	55	70	84	48	121
W	b.d.	b.d.	b.d.	b.d.	33	59	b.d.	28	b.d.	15	b.d.	29	27	31	22	b.d.
b.d.: below detection level; n.a.: not analysed
